# Supplementary material for: A novel approach for enhancing the color and antimicrobial properties of pine and beech wood using Se-NPs
Source: PubMed Central journal article supplement (PMC10415366; doi:10.1038/s41598-023-39748-5), 2023-08-10
Supplement: 41598_2023_39748_MOESM5_ESM.pdf [file 41598_2023_39748_MOESM5_ESM.pdf]

# Project 1

9/21/2020 11:32:32 AM

Spectrum processing :  
No peaks omitted

Processing option : All elements analyzed (Normalised)  
Number of iterations = 5

Standard :  
C CaCO3 1-Jun-1999 12:00 AM  
O SiO2 1-Jun-1999 12:00 AM  
Se Se 1-Jun-1999 12:00 AM

Elem... Weight% Atomic%

|      |       |       |
|------|-------|-------|
| C K  | 53.10 | 60.73 |
| O K  | 45.44 | 39.01 |
| Se K | 1.46  | 0.25  |

Totals 100.00

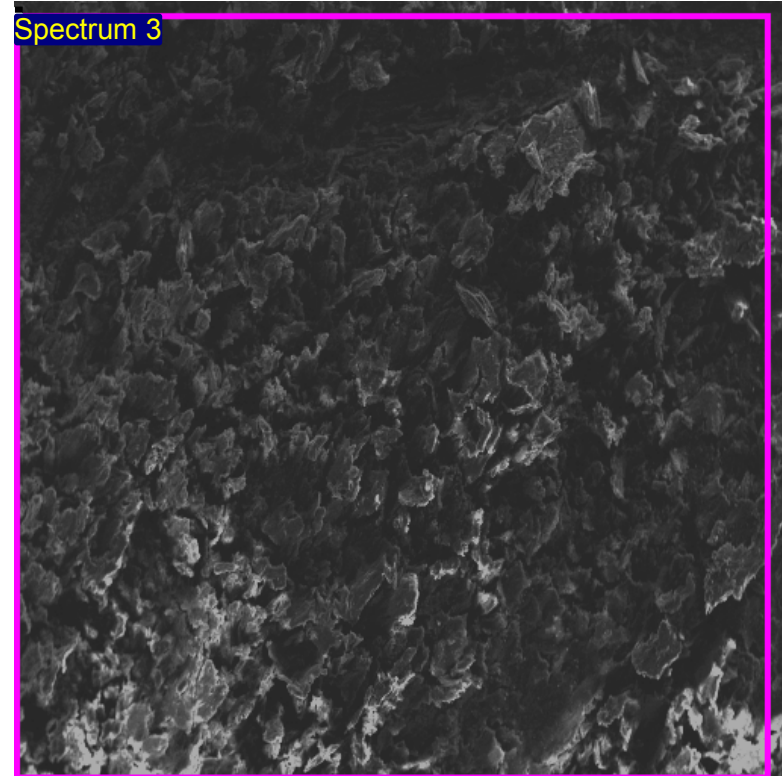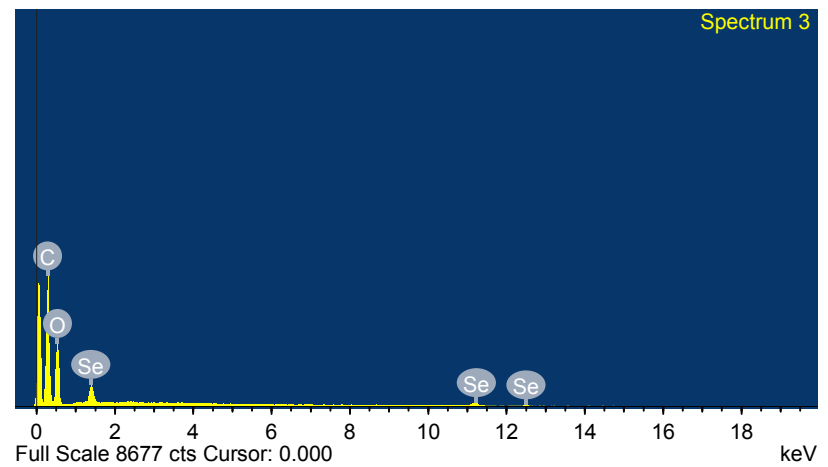

Comment:
