# Supplementary material for: A novel approach for enhancing the color and antimicrobial properties of pine and beech wood using Se-NPs
Source: PubMed Central journal article supplement (PMC10415366; doi:10.1038/s41598-023-39748-5), 2023-08-10
Supplement: 41598_2023_39748_MOESM6_ESM.pdf [file 41598_2023_39748_MOESM6_ESM.pdf]

# Project 1

11/5/2019 12:55:33 PM

Spectrum processing :

Peaks possibly omitted : 2.146, 3.682, 9.692 keV

Processing option : All elements analyzed (Normalised)

Number of iterations = 5

Standard :

C CaCO<sub>3</sub> 1-Jun-1999 12:00 AM

O SiO<sub>2</sub> 1-Jun-1999 12:00 AM

Se Se 1-Jun-1999 12:00 AM

Elem... Weight% Atomic%

C K 51.93 59.31

O K 47.30 40.56

Se K 0.76 0.13

Totals 100.00

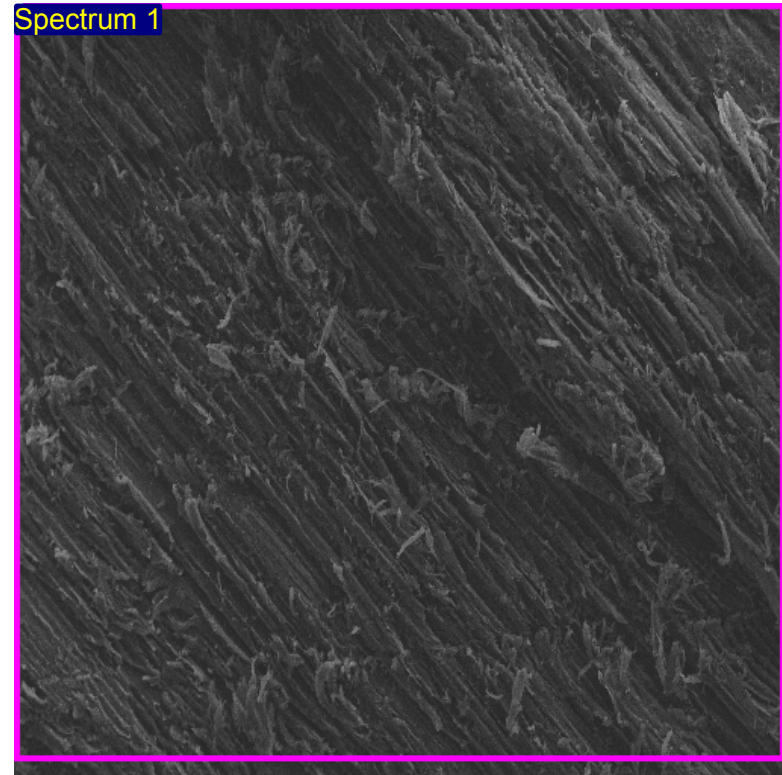

1mm

Electron Image 1

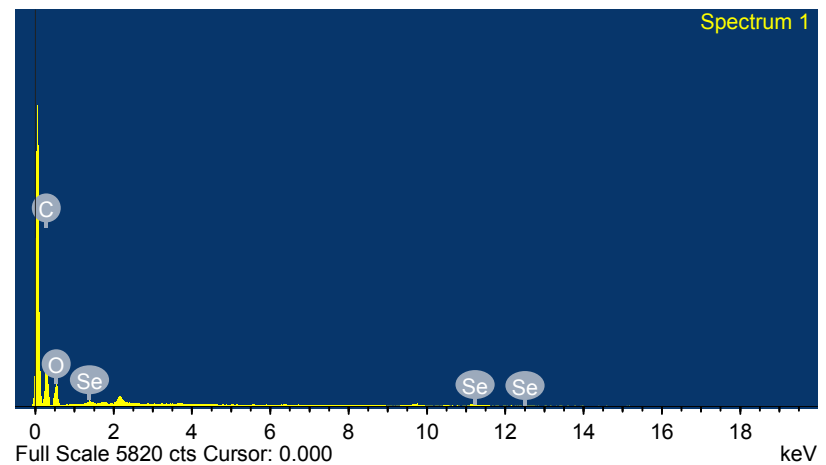

Spectrum 1

Comment:
